# Supplementary material for: Serum MicroRNA Signatures Identified by Solexa Sequencing Predict Sepsis Patients’ Mortality: A Prospective Observational Study
Source: PLoS One. 2012 Jun 15;7(6):e38885. doi: 10.1371/journal.pone.0038885 (PMC3376145; doi:10.1371/journal.pone.0038885)
Supplement: Table S3 — Comparisons of miRNAs between 9 survivors (S) and 9 non-survivors (D) detected by Solexa sequencing. (XLS) [file pone.0038885.s005.xls]

## Sheet: Sheet1
	Table S3. Comparison of miRNAs between 9 survivors(S) and 9 non-survivors(D)detected by Solexa sequencing.
	pairwise	miR-name	S-std#	D-std	fold-change(log2 D/S)*	p-value
	S-D	hsa-miR-200a	0.01	36.2823	11.8251	5.99546e-58
	S-D	hsa-miR-30c-1*	0.01	35.8746	11.8087	2.63354e-57
	S-D	hsa-miR-194	0.01	35.6708	11.8005	5.51949e-57
	S-D	hsa-miR-23b	0.01	33.4286	11.7069	1.89167e-53
	S-D	hsa-miR-7	0.01	28.129	11.4578	4.28717e-45
	S-D	hsa-miR-765	0.01	18.5488	10.8571	5.4454e-30
	S-D	hsa-miR-152	0.01	17.122	10.7416	9.67254e-28
	S-D	hsa-miR-30c-2*	0.01	14.8798	10.5391	3.31502e-24
	S-D	hsa-miR-574-3p	0.01	14.8798	10.5391	3.31502e-24
	S-D	hsa-miR-548l	0.01	14.2683	10.4786	3.05184e-23
	S-D	hsa-miR-149*	0.01	13.8607	10.4368	1.34054e-22
	S-D	hsa-miR-3190	0.01	13.8607	10.4368	1.34054e-22
	S-D	hsa-miR-1270	0.01	13.0453	10.3493	2.58651e-21
	S-D	hsa-miR-223*	0.01	12.23	10.2562	4.99056e-20
	S-D	hsa-miR-186	0.01	9.5802	9.90391	7.51298e-16
	S-D	hsa-miR-210	0.01	8.1533	9.67124	1.33451e-13
	S-D	hsa-miR-208b	0.186	63.7998	8.42211	4.09595e-99
	S-D	hsa-miR-302b	0.186	54.4235	8.19278	2.12085e-84
	S-D	hsa-miR-335	0.186	43.2126	7.86001	7.98506e-67
	S-D	hsa-miR-184	0.372	38.9321	6.70951	2.05766e-58
	S-D	hsa-miR-500a*	0.186	18.5488	6.63988	2.67388e-28
	S-D	hsa-miR-502-3p	0.186	18.5488	6.63988	2.67388e-28
	S-D	hsa-miR-92a-1*	0.744	30.1673	5.34154	4.40722e-42
	S-D	hsa-miR-206	59.8939	1757.65	4.8751	0
	S-D	hsa-miR-127-3p	1.302	34.6516	4.73412	2.4683e-45
	S-D	hsa-miR-499-5p	39.2472	828.582	4.39998	0
	S-D	hsa-miR-3615	0.558	6.7265	3.59152	2.84947e-08
	S-D	hsa-miR-20b*	1.116	9.9878	3.16183	1.26802e-10
	S-D	hsa-miR-122	18149.5	160445	3.14407	0
	S-D	hsa-miR-151-5p	4.0921	33.021	3.01247	1.10364e-30
	S-D	hsa-miR-193b*	104.349	710.155	2.76671	0
	S-D	hsa-miR-181b	7.0682	43.4165	2.61883	1.45585e-34
	S-D	hsa-miR-664*	12.8344	73.7876	2.52336	2.62955e-55
	S-D	hsa-miR-378c	33.6671	174.889	2.37703	4.60233e-120
	S-D	hsa-miR-877	4.0921	17.3258	2.08201	1.85193e-11
	S-D	hsa-miR-99a	11.5324	48.5123	2.07266	2.45306e-29
	S-D	hsa-miR-483-5p	159.965	663.681	2.05273	0
	S-D	hsa-miR-375	15.4385	63.7998	2.04702	1.70531e-37
	S-D	hsa-miR-378	395.262	1543.63	1.96544	0
	S-D	hsa-miR-26b	31.435	120.058	1.93329	3.69444e-64
	S-D	hsa-miR-3154	9.6723	35.6708	1.88281	1.57549e-19
	S-D	hsa-miR-193a-5p	20.4606	72.3608	1.82236	1.99322e-36
	S-D	hsa-miR-1323	12.4624	40.9705	1.717	9.94545e-20
	S-D	hsa-miR-17	11.3464	31.798	1.4867	5.70626e-13
	S-D	hsa-miR-889	29.0169	78.272	1.4316	3.57344e-28
	S-D	hsa-miR-92b*	31.435	82.9601	1.40005	7.88858e-29
	S-D	hsa-miR-181a	47.2455	118.427	1.32575	2.44758e-37
	S-D	hsa-miR-30a	54.4997	136.568	1.3253	8.91518e-43
	S-D	hsa-miR-22	153.083	376.48	1.29826	3.31543e-111
	S-D	hsa-miR-371-5p	25.1108	61.3538	1.28884	2.55108e-19
	S-D	hsa-miR-1	2322.28	5462.93	1.23413	0
	S-D	hsa-miR-10a	133.18	308.807	1.21333	1.64977e-82
	S-D	hsa-miR-30a*	13.5784	30.9826	1.19014	2.08188e-09
	S-D	hsa-miR-222	52.8257	117	1.1472	1.02441e-29
	S-D	hsa-miR-23b*	24.9248	54.6273	1.13204	2.02225e-14
	S-D	hsa-miR-302a	0.558	1.0192	0.8691	0.422011
	S-D	hsa-miR-199b-5p	29.9469	54.6273	0.867215	8.70706e-10
	S-D	hsa-miR-130a	15.2525	25.683	0.751768	0.000203973
	S-D	hsa-let-7i	477.663	792.504	0.730424	2.60943e-90
	S-D	hsa-miR-133a	13.3924	21.8102	0.703588	0.00124197
	S-D	hsa-miR-125b	13.7644	22.2178	0.690774	0.00134139
	S-D	hsa-miR-503	33.8531	52.7928	0.641053	3.62434e-06
	S-D	hsa-miR-92b	42.7814	65.0228	0.603962	1.09045e-06
	S-D	hsa-miR-192	1417.36	2052.4	0.534098	8.7106e-133
	S-D	hsa-miR-148a	66.5901	96.2093	0.530869	1.30301e-07
	S-D	hsa-miR-320d	93.747	125.969	0.426223	7.91669e-07
	S-D	hsa-miR-320c	348.761	422.139	0.275478	2.03516e-09
	S-D	hsa-miR-128	39.8053	46.2701	0.21712	0.113929
	S-D	hsa-miR-139-3p	27.5289	30.1673	0.132039	0.430011
	S-D	hsa-miR-485-5p	17.2985	18.5488	0.100679	0.633966
	S-D	hsa-miR-30e*	18.4146	18.9565	0.0418426	0.837889
	S-D	hsa-let-7e	322.72	331.229	0.0375451	0.450459
	S-D	hsa-let-7a	8650.95	8876.53	0.0371374	0.000113403
	S-D	hsa-miR-30d	131.134	132.899	0.0192906	0.804438
	S-D	hsa-miR-423-5p	89324.5	88749.4	-0.00931864	0.00202368
	S-D	hsa-miR-320b	2884.02	2804.54	-0.0403171	0.0170209
	S-D	hsa-let-7g	685.246	663.069	-0.0474615	0.171643
	S-D	hsa-miR-96	13.3924	12.8415	-0.0606008	0.812411
	S-D	hsa-miR-320a	11535.7	10847.2	-0.0887861	1.96494e-25
	S-D	hsa-miR-302a*	99.1411	93.1518	-0.0898996	0.329249
	S-D	hsa-let-7c	1368.63	1270.7	-0.107115	1.58609e-05
	S-D	hsa-miR-103	758.532	698.333	-0.119296	0.000355948
	S-D	hsa-miR-221	241.436	215.044	-0.167007	0.00518258
	S-D	hsa-miR-10b	98.2111	86.0176	-0.191254	0.0422265
	S-D	hsa-miR-27a	91.5149	79.495	-0.203143	0.0376888
	S-D	hsa-miR-107	611.215	530.782	-0.203562	7.08075e-08
	S-D	hsa-miR-101	2317.45	1978	-0.228496	8.99118e-32
	S-D	hsa-miR-199a-3p	1045.35	891.363	-0.229906	2.30129e-15
	S-D	hsa-miR-199b-3p	1045.35	891.363	-0.229906	2.30129e-15
	S-D	hsa-let-7f	10621.9	9041.63	-0.232382	1.10561e-143
	S-D	hsa-miR-21	890.596	738.284	-0.270596	1.26487e-17
	S-D	hsa-miR-885-3p	5.9522	4.892	-0.282999	0.475487
	S-D	hsa-let-7b	8908.94	7281.53	-0.291011	1.51921e-184
	S-D	hsa-miR-27b	98.5831	79.495	-0.310476	0.001211
	S-D	hsa-miR-24	136.714	110.07	-0.312744	0.000123656
	S-D	hsa-miR-125a-5p	47.0595	37.5053	-0.327392	0.0188918
	S-D	hsa-miR-29a	173.73	135.141	-0.362373	6.63999e-07
	S-D	hsa-miR-23a	100.629	77.6605	-0.373796	9.88788e-05
	S-D	hsa-miR-2110	27.1569	20.3833	-0.413931	0.0266042
	S-D	hsa-miR-130b	27.3429	20.1795	-0.438276	0.0189824
	S-D	hsa-miR-363	27.5289	20.1795	-0.448057	0.0162897
	S-D	hsa-miR-1307	12.6484	8.9687	-0.495984	0.0751667
	S-D	hsa-miR-143	112.72	79.2911	-0.507508	4.61181e-08
	S-D	hsa-miR-744	81.8426	54.2196	-0.594038	7.99136e-08
	S-D	hsa-miR-92a	849.303	560.541	-0.599459	3.355e-68
	S-D	hsa-miR-142-5p	506.866	330.21	-0.618221	1.15636e-43
	S-D	hsa-miR-31	22.1347	13.6568	-0.69669	0.00135364
	S-D	hsa-miR-191	285.519	175.297	-0.703789	2.01563e-31
	S-D	hsa-miR-185	4346.96	2629.24	-0.725358	0
	S-D	hsa-miR-1228*	266.546	154.506	-0.786728	2.24179e-35
	S-D	hsa-let-7d	1121.99	632.087	-0.827862	4.89234e-156
	S-D	hsa-miR-151-3p	28.8309	15.899	-0.85868	1.15544e-05
	S-D	hsa-miR-144	40.9213	21.4025	-0.935073	1.90921e-08
	S-D	hsa-miR-98	40.3633	18.9565	-1.09035	2.40011e-10
	S-D	hsa-miR-25*	138.574	62.9845	-1.13759	4.81695e-34
	S-D	hsa-let-7d*	31.621	13.8607	-1.18988	1.88764e-09
	S-D	hsa-miR-99b	120.16	49.9391	-1.26671	6.27932e-35
	S-D	hsa-miR-140-3p	23325.9	9236.29	-1.33655	0
	S-D	hsa-miR-26a	40.9213	15.899	-1.36392	2.87792e-14
	S-D	hsa-miR-215	117.37	44.8433	-1.3881	4.72352e-39
	S-D	hsa-miR-106b	71.2403	23.0332	-1.62898	2.26277e-30
	S-D	hsa-miR-93	82.2146	23.6447	-1.79788	1.00881e-39
	S-D	hsa-miR-223	381.312	108.439	-1.81408	4.77424e-180
	S-D	hsa-miR-106b*	28.6449	7.5418	-1.9253	4.18185e-16
	S-D	hsa-miR-183	36.6432	9.5802	-1.93542	2.48153e-20
	S-D	hsa-miR-486-5p	2623.8	575.421	-2.18897	0
	S-D	hsa-miR-15a	497.566	102.732	-2.276	7.48992697773115e-314
	S-D	hsa-miR-30e	109.371	18.345	-2.57578	4.01335e-81
	S-D	hsa-miR-424	79.9825	9.784	-3.03119	1.15289e-70
	S-D	hsa-miR-15b	484.359	57.481	-3.07492	0
	S-D	hsa-miR-16	3007.16	325.522	-3.20758	0
	S-D	hsa-miR-451	844.653	87.6483	-3.26856	0
	S-D	hsa-miR-25	91.1429	9.3763	-3.28104	1.86687e-86
	S-D	hsa-miR-124	19.9026	1.4268	-3.8021	2.04422e-22
	S-D	hsa-miR-99b*	2.9761	0.2038	-3.8682	0.000297326
	S-D	hsa-miR-330-3p	7.6262	0.4077	-4.22538	6.7403e-10
	S-D	hsa-miR-340	19.3446	0.4077	-5.56828	7.10973e-27
	S-D	hsa-miR-34c-5p	21.9487	0.4077	-5.75048	1.03642e-30
	S-D	hsa-miR-548c-5p	10.9743	0.2038	-5.75083	7.51808e-16
	S-D	hsa-miR-411	25.4828	0.4077	-5.96587	6.1806e-36
	S-D	hsa-miR-342-3p	26.5988	0.4077	-6.02771	1.37297e-37
	S-D	hsa-miR-182	29.7609	0.4077	-6.18977	2.78983e-42
	S-D	hsa-miR-372	48.1755	0.6115	-6.2998	3.98533e-68
	S-D	hsa-miR-423-3p	81.6566	1.0192	-6.32406	8.78781e-115
	S-D	hsa-miR-424*	16.9265	0.2038	-6.37599	1.10938e-24
	S-D	hsa-miR-29c	17.4846	0.2038	-6.42279	1.63636e-25
	S-D	hsa-miR-1298	20.8327	0.2038	-6.67555	1.65482e-30
	S-D	hsa-miR-532-5p	23.6227	0.2038	-6.85688	1.11634e-34
	S-D	hsa-miR-628-3p	1.8601	0.01	-7.53924	0.00159704
	S-D	hsa-miR-3690	2.0461	0.01	-7.67673	0.000835035
	S-D	hsa-miR-409-3p	2.2321	0.01	-7.80226	0.00043661
	S-D	hsa-miR-148b	2.6041	0.01	-8.02464	0.000119364
	S-D	hsa-miR-1250	5.2082	0.01	-9.02464	1.36247e-08
	S-D	hsa-miR-19b	111.79	0.2038	-9.09941	1.70328e-167
	S-D	hsa-miR-3928	5.7662	0.01	-9.17148	1.94758e-09
	S-D	hsa-miR-144*	5.9522	0.01	-9.21728	1.01832e-09
	S-D	hsa-miR-323b-3p	7.2542	0.01	-9.50267	1.08796e-11
	S-D	hsa-miR-155	8.3703	0.01	-9.70914	2.22305e-13
	S-D	hsa-miR-126*	8.9283	0.01	-9.80225	3.17774e-14
	S-D	hsa-miR-3613-3p	8.9283	0.01	-9.80225	3.17774e-14
	S-D	hsa-miR-574-5p	8.9283	0.01	-9.80225	3.17774e-14
	S-D	hsa-miR-22*	9.1143	0.01	-9.83198	1.66153e-14
	S-D	hsa-miR-1285	9.6723	0.01	-9.91772	2.37507e-15
	S-D	hsa-miR-361-5p	9.6723	0.01	-9.91772	2.37507e-15
	S-D	hsa-miR-28-3p	9.8583	0.01	-9.9452	1.24184e-15
	S-D	hsa-miR-30b*	10.0443	0.01	-9.97216	6.49315e-16
	S-D	hsa-miR-146a	10.4163	0.01	-10.0246	1.77515e-16
	S-D	hsa-miR-1255b	10.6023	0.01	-10.0502	9.28162e-17
	S-D	hsa-miR-548t	10.9743	0.01	-10.0999	2.53748e-17
	S-D	hsa-miR-1291	11.1604	0.01	-10.1242	1.32676e-17
	S-D	hsa-miR-17*	11.7184	0.01	-10.1946	1.89654e-18
	S-D	hsa-miR-483-3p	12.4624	0.01	-10.2834	1.41749e-19
	S-D	hsa-miR-150	12.6484	0.01	-10.3047	7.41155e-20
	S-D	hsa-miR-425	12.6484	0.01	-10.3047	7.41155e-20
	S-D	hsa-miR-134	13.2064	0.01	-10.367	1.05944e-20
	S-D	hsa-miR-29b	13.5784	0.01	-10.4071	2.89639e-21
	S-D	hsa-miR-23a*	14.8805	0.01	-10.5392	3.09445e-23
	S-D	hsa-miR-122*	15.2525	0.01	-10.5748	8.45985e-24
	S-D	hsa-miR-524-5p	16.3685	0.01	-10.6767	1.72862e-25
	S-D	hsa-miR-627	18.0426	0.01	-10.8172	5.04901e-28
	S-D	hsa-miR-20a	20.2746	0.01	-10.9855	2.10805e-31
	S-D	hsa-miR-339-3p	21.0187	0.01	-11.0374	1.57557e-32
	S-D	hsa-miR-486-3p	21.2047	0.01	-11.0502	8.23812e-33
	S-D	hsa-miR-146b-5p	27.1569	0.01	-11.4071	8.02221e-42
	S-D	hsa-miR-200b	44.6414	0.01	-12.1241	2.70964e-68
	#:S-st:Normalize the expression of miRNAs in survivors, normalization formula=Actual miRNA count/Total count of clean reads*1000000; *Fold-change=log2(D/S）

## Sheet: 筛选后
pairwise	miR-name	S-std	D-std	fold-change(log2 D/S)	p-value	sig-lable
S-D	hsa-miR-451	844.653	87.6483	-3.26856	0	**
S-D	hsa-miR-16	3007.16	325.522	-3.20758	0	**
S-D	hsa-miR-15b	484.359	57.481	-3.07492	0	**
S-D	hsa-miR-15a	497.566	102.732	-2.276	7.48992697773115e-314	**
S-D	hsa-miR-486-5p	2623.8	575.421	-2.18897	0	**
S-D	hsa-miR-223	381.312	108.439	-1.81408	4.77424e-180	**
S-D	hsa-miR-378c	33.6671	174.889	2.37703	4.60233e-120	**
S-D	hsa-miR-483-5p	159.965	663.681	2.05273	0	**
S-D	hsa-miR-193b*	104.349	710.155	2.76671	0	**
S-D	hsa-miR-122	18149.5	160445	3.14407	0	**
S-D	hsa-miR-499-5p	39.2472	828.582	4.39998	0	**
S-D	hsa-miR-206	59.8939	1757.65	4.8751	0	**
筛选标准：	1.S或D组miRNAcopys>50即表达量>80
	2.fold-change>2
	3.P<0.001
